# Supplementary material
Source: PubMed Central journal article supplement (PMC6646091)
Supplement: NIHMS1531270-supplement-Supplemental_Material.pdf [file NIHMS1531270-supplement-Supplemental_Material.pdf]

## SUPPLEMENTAL MATERIAL

**Supplemental Table I.** Demographic, Clinical and Radiographic Characteristics and Outcomes of Included versus Excluded Patients.

| Variable, n (%)                               | Included<br>(n=780) | Excluded<br>(n=90) | <i>p</i> |
|-----------------------------------------------|---------------------|--------------------|----------|
| <b>Age years, mean (SD)</b>                   | 62 (13)             | 60 (13)            | 0.22     |
| <b>Sex (female)</b>                           | 289/780 (37)        | 36/90 (40)         | 0.67     |
| <b>Black</b>                                  | 87/780 (11)         | 22/90 (24)         | 0.001    |
| <b>White</b>                                  | 194/780 (25)        | 37/90 (41)         | 0.001    |
| <b>Hypertension</b>                           | 606/755 (80)        | 79/89 (89)         | 0.07     |
| <b>Diabetes</b>                               | 129/766 (17)        | 22/89 (25)         | 0.09     |
| <b>Hyperlipidemia</b>                         | 178/740 (24)        | 22/83 (27)         | 0.72     |
| <b>Congestive heart failure</b>               | 20/772 (3)          | 8/90 (9)           | 0.004    |
| <b>Atrial fibrillation</b>                    | 23/773 (3)          | 5/90 (6)           | 0.32     |
| <b>Prior ischemic stroke</b>                  | 127/776 (16)        | 14/89 (16)         | 0.93     |
| <b>Smoker</b>                                 | 349/780 (45)        | 36/90 (40)         | 0.46     |
| <b>On antihypertensive medication</b>         | 361/775 (47)        | 57/90 (63)         | 0.004    |
| <b>Admission GCS, median (IQR)</b>            | 15 (13-15)          | 14 (13-15)         | 0.25     |
| <b>Admission systolic BP mmHg, mean (SD)</b>  | 176 (25)            | 173 (28)           | 0.36     |
| <b>Admission diastolic BP mmHg, mean (SD)</b> | 112 (20)            | 108 (22)           | 0.09     |
| <b>Admission INR</b>                          | 0.99 (0.11)         | 1.00 (0.11)        | 0.18     |
| <b>Thalamic location</b>                      | 336/780 (43)        | 33/90 (37)         | 0.29     |
| <b>ICH Volume mL, median (IQR)</b>            | 9.1 (4.7-16.7)      | 11.5 (6.9-18.3)    | 0.02     |
| <b>PHE Volume mL, median (IQR)</b>            | 1.3 (0.6-2.4)       | 1.3 (0.8-2.0)      | 0.85     |
| <b>IVH</b>                                    | 216/780 (28)        | 39/0 (43)          | 0.003    |
| <b>Time to baseline scan min, mean (SD)</b>   | 99 (51)             | 89 (56)            | 0.08     |
| <b>Intensive Treatment</b>                    | 405/780 (52)        | 37/90 (41)         | 0.07     |
| <b>Poor Outcome</b>                           | 286/754 (38)        | 39/81 (48)         | 0.09     |
| <b>Mortality</b>                              | 41/754 (5)          | 10/81 (12)         | 0.03     |

**Supplemental Figure I.** Association Between 24-hour Systolic Blood Pressure and PHER, by Treatment Group.

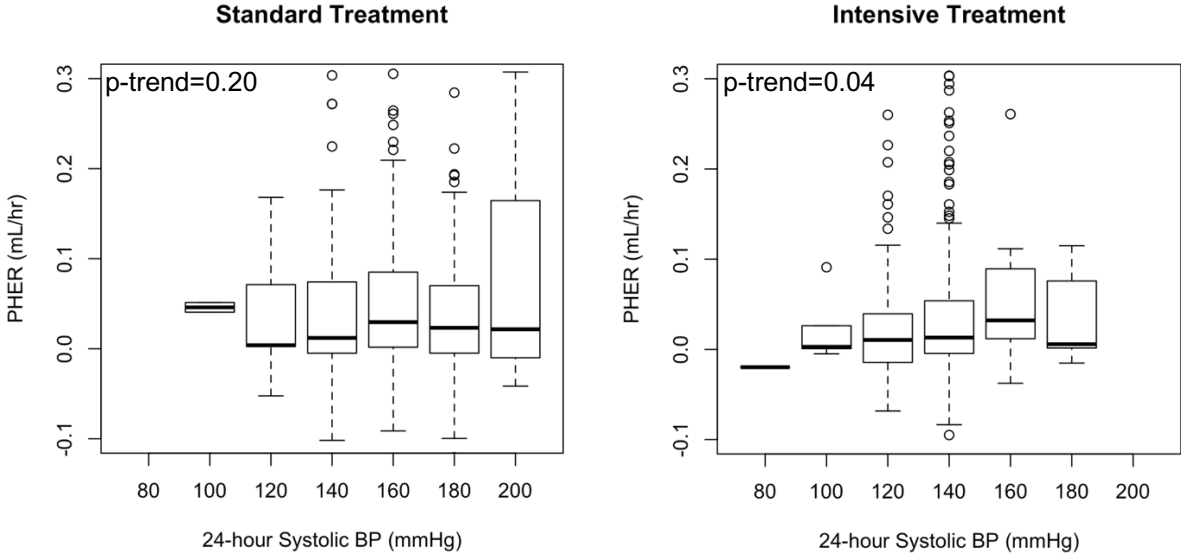

**Abbreviations:** PHER = perihematoma edema expansion rate, BP = blood pressure.
